# Supplementary material for: Topical Application of the PI3Kβ-Selective Small Molecule Inhibitor TGX-221 Is an Effective Treatment Option for Experimental Epidermolysis Bullosa Acquisita
Source: PubMed Central journal article supplement (PMC8452940; doi:10.3389/fmed.2021.713312), 2021-09-07
Supplement: Data_Sheet_1.pdf [file Data_Sheet_1.pdf]

## Supplementary Figures

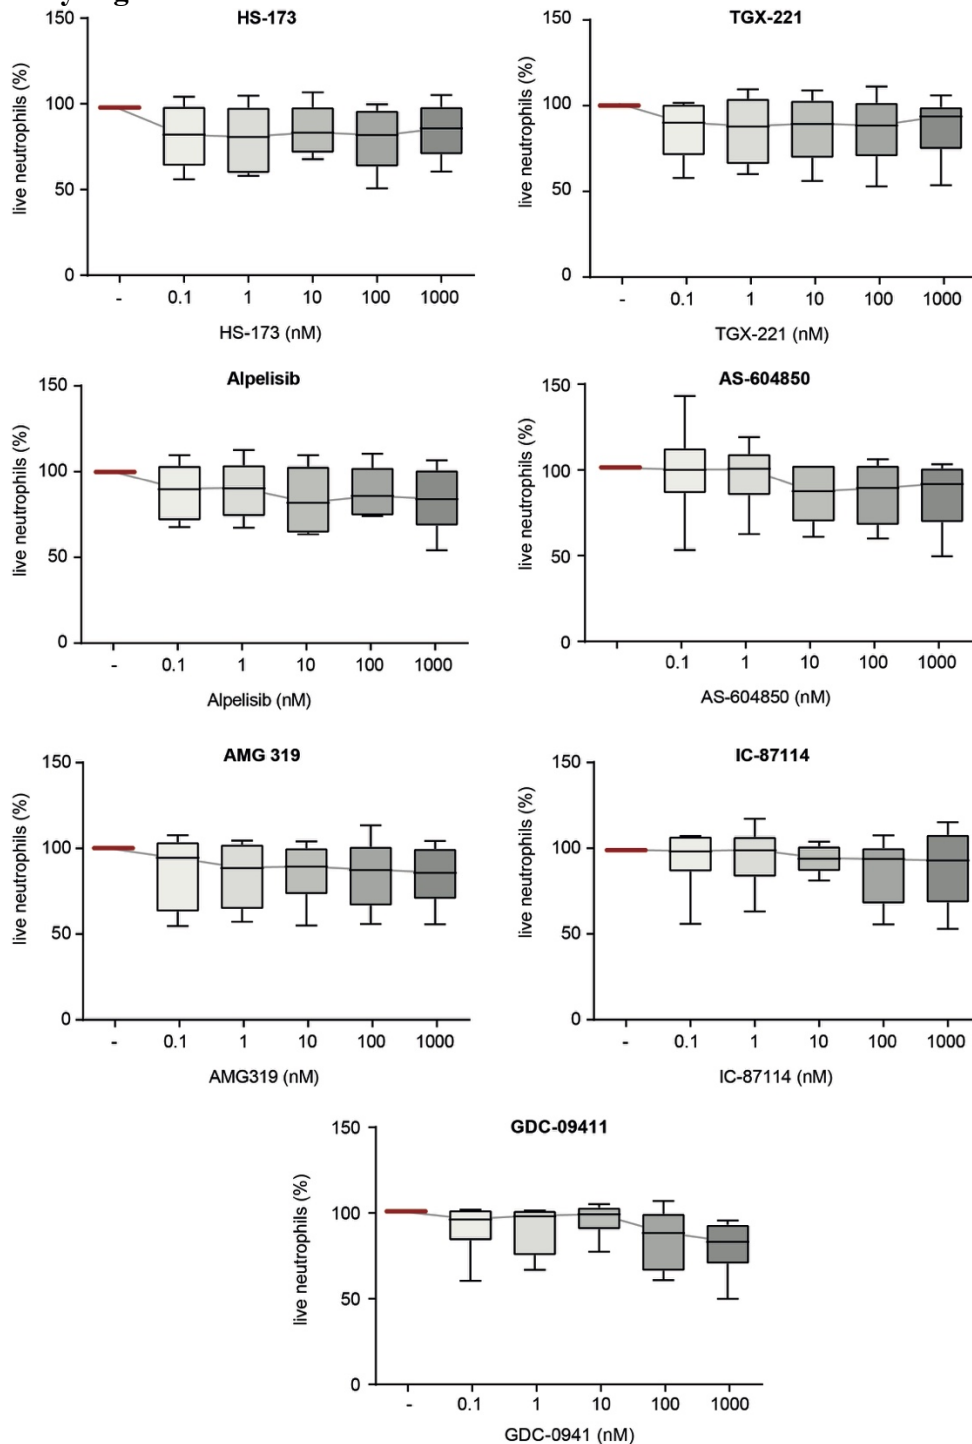

**Figure S1. None of the PI3K inhibitors had toxic effects on human PMNs.** Human PMNs were stimulated with immobilized ICs in presence/absence of either one of the PI3K isoform-selective inhibitors. To exclude toxicity by the inhibitors, the amount of propidium iodide (PI)- and Annexin V-positive cells after IC stimulation was identified. Data were normalized to positive control (IC-stimulated PMNs with solvent). Data are shown as Tukey's box-and-whisker plots.  $n=6$ . ANOVA on ranks (Kruskal-Wallis) was applied followed by a Bonferroni t-test for multiple comparisons. Data were normalized to stimulated cells. \* $p<0.05$ , \*\* $p<0.01$ , \*\*\* $p<0.001$ , \*\*\*\* $p<0.0001$ .

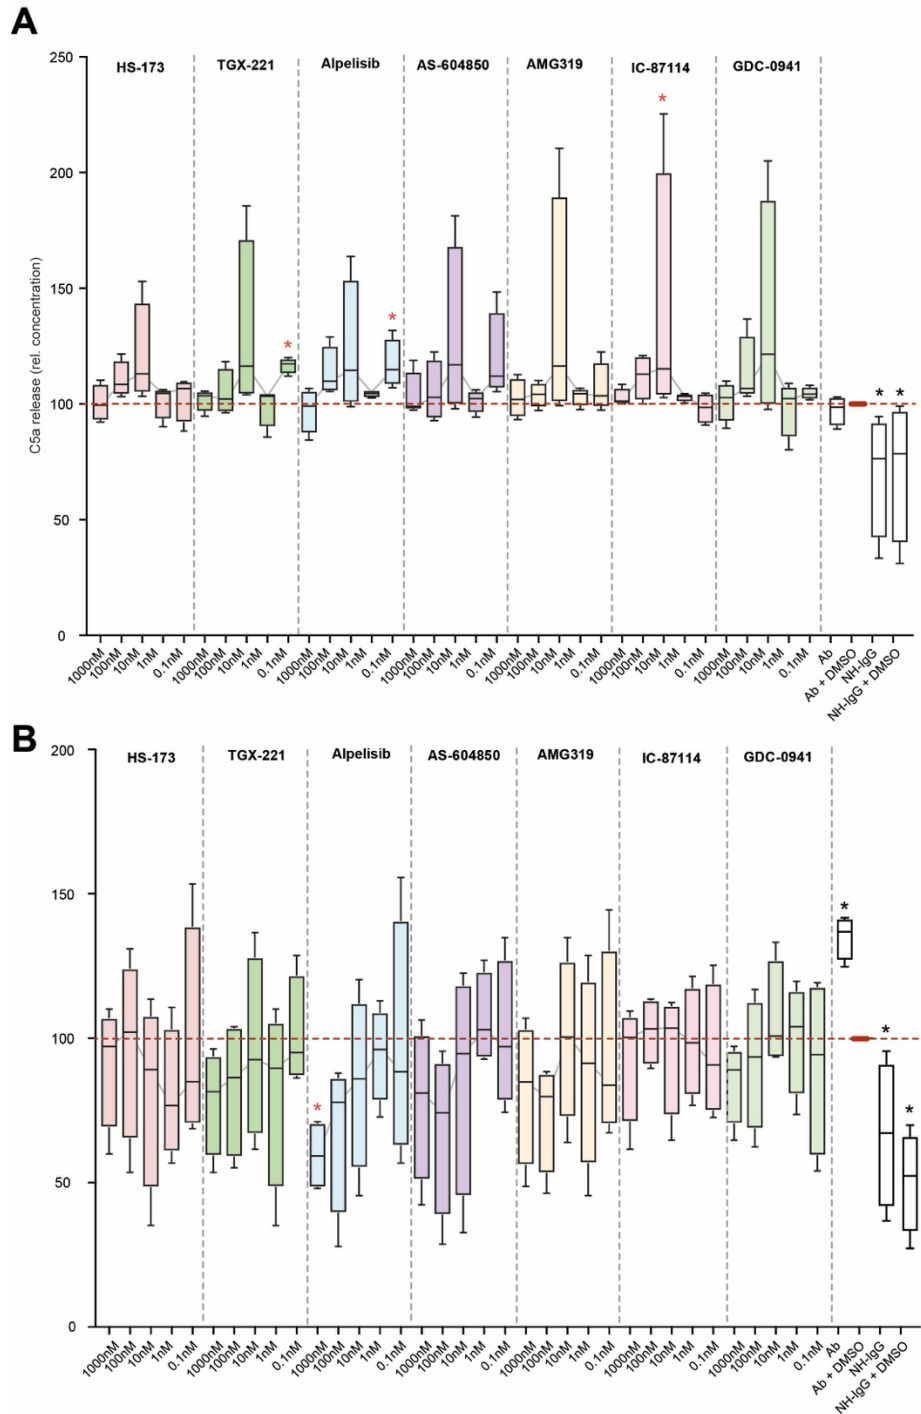

**Figure S2. EBA-IgG-induced C5a and IL-8 release from keratinocytes is mostly independent of PI3K.** HaCaT cells were stimulated for 24 h with purified EBA-IgG in presence/absence of either one of the PI3K isoform-selective inhibitors and the (A) C5a and (B) IL-8 release into the supernatant was determined. Data were normalized to positive control (stimulation of cells with EBA-IgG and solvent). Data are shown as Tukey's box-and-whisker plots. n=4. Red asterisks: ANOVA on ranks (Kruskal-Wallis) was applied followed by a Bonferroni t-test for multiple comparisons individually for every PI3Ki in comparison to stimulated cells (Ab + DMSO). Incubation of cells with normal human IgG (NH-IgG) ( $\pm$  vehicle) served as negative control. Black asterisks: Mann-Whitney test was applied for comparison between positive control (Ab + DMSO) and different negative controls. Data were normalized to stimulated cells. \*p<0.05, \*\*p<0.01, \*\*\*p<0.001, \*\*\*\*p<0.0001.

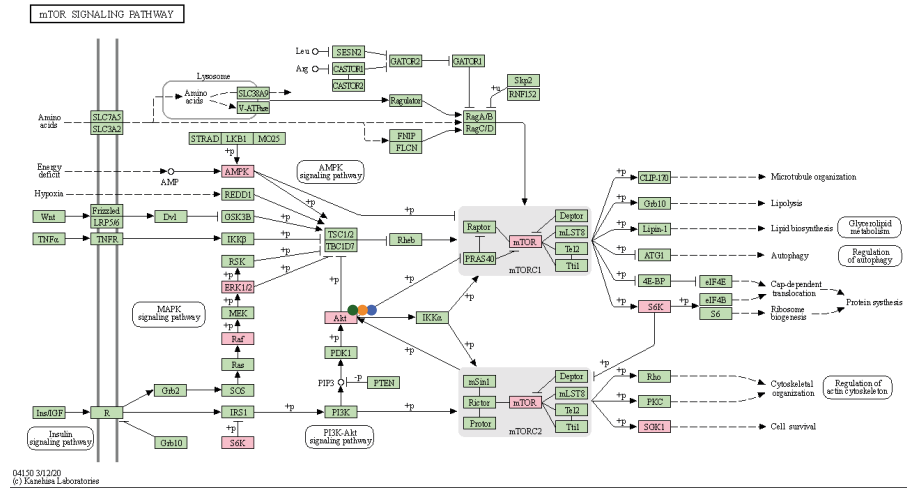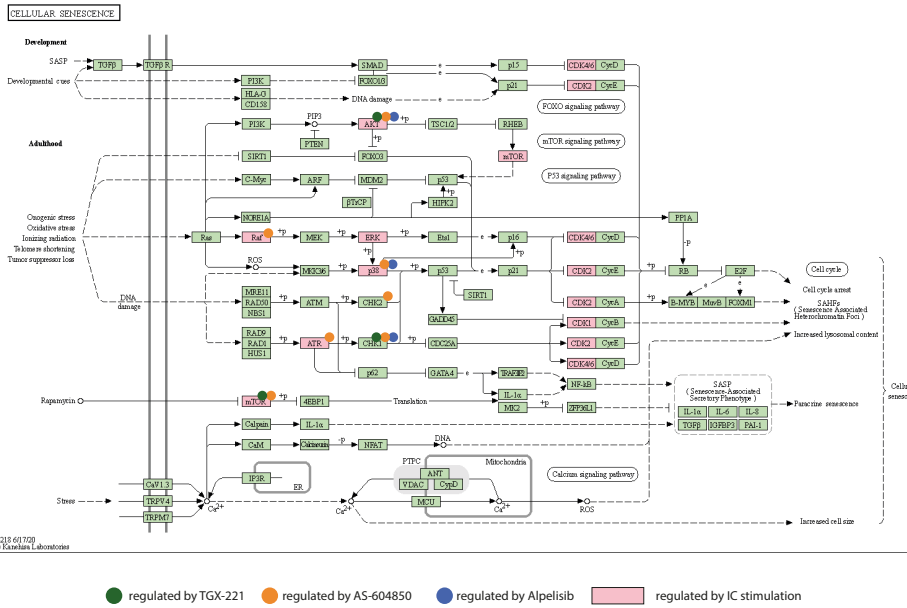

**Figure S3. Influence of PI3K inhibition on mTOR pathways and pathways for cellular senescence.** KEGG pathways for cellular senescence ([https://www.genome.jp/dbget-bin/www\\_bget?hsa04218](https://www.genome.jp/dbget-bin/www_bget?hsa04218)) and mTOR signaling pathway ([https://www.genome.jp/kegg-bin/show\\_pathway?hsa04150](https://www.genome.jp/kegg-bin/show_pathway?hsa04150)), kinases regulated by ICs (cumulative stimulation for 2, 8, and 15 min using PamGene) are shown in bright red. Kinases, that are regulated by the respective kinase inhibitors are marked with a green dot (TGX-221), orange dot (AS-604850) and blue dot (alpelisib).

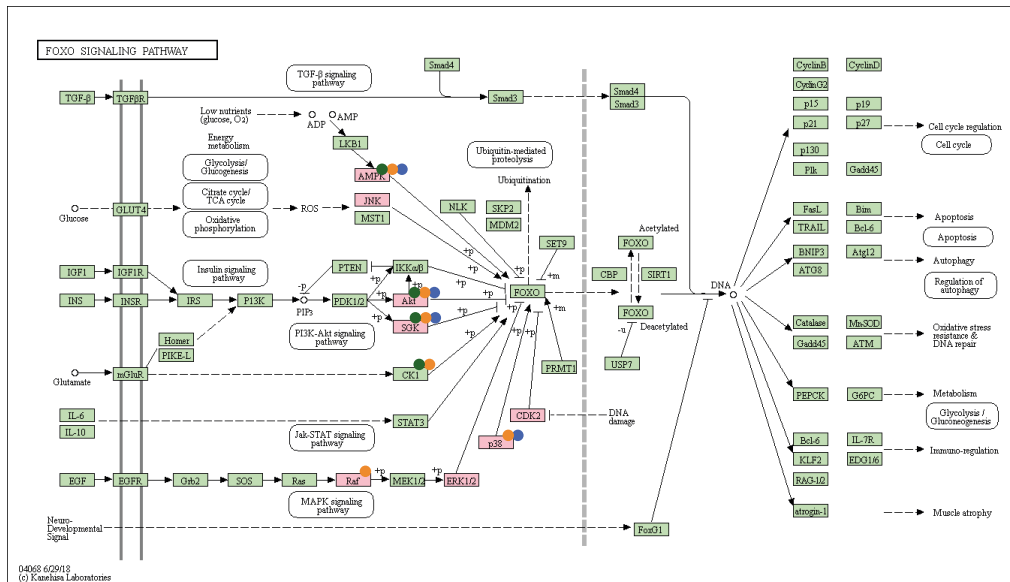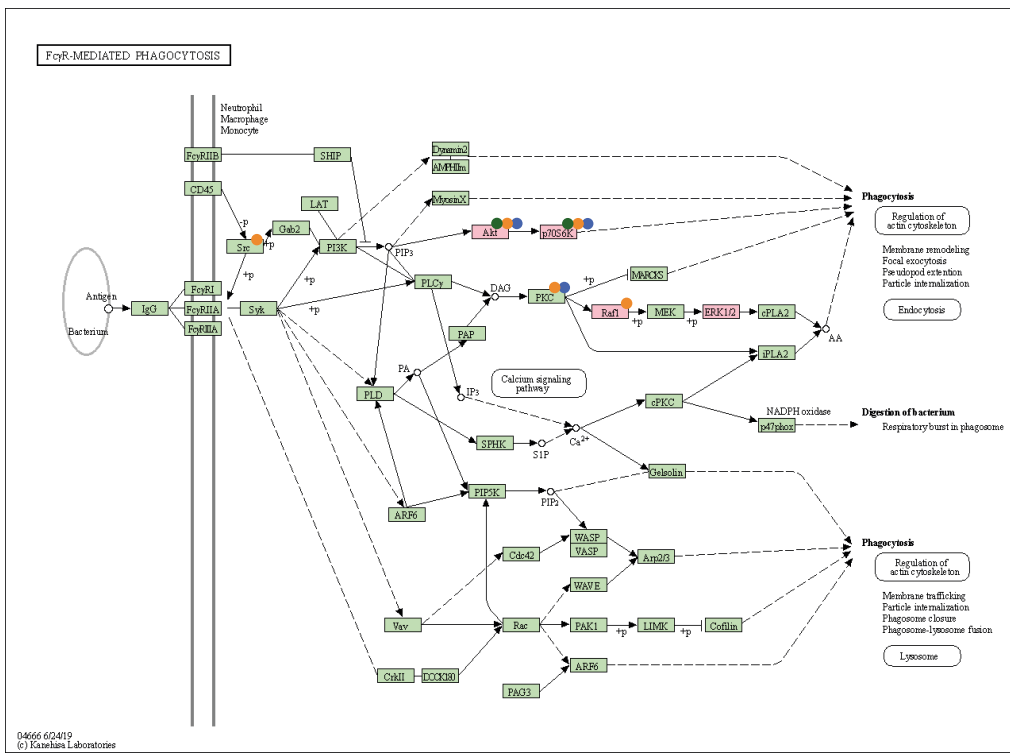

● regulated by TGX-221 ● regulated by AS-604850 ● regulated by Alpelisib ■ regulated by IC stimulation

**Figure S4. Influence of PI3K inhibition on KEGG pathways for FOXO signaling and FcγR-mediated phagocytosis.** KEGG pathways for FOXO signaling ([https://www.genome.jp/kegg-bin/show\\_pathway?hsa04068](https://www.genome.jp/kegg-bin/show_pathway?hsa04068)) and FcγR-mediated phagocytosis signaling pathway ([https://www.genome.jp/kegg-bin/show\\_pathway?hsa04666](https://www.genome.jp/kegg-bin/show_pathway?hsa04666)), kinases regulated by ICs (cumulative stimulation for 2, 8, and 15 min using PamGene) are shown in bright red. Kinases regulated by ICs (cumulative stimulation for 2, 8, and 15 min using PamGene) are shown in bright red. Kinases, that are regulated by the respective kinase inhibitors are marked with a green dot (TGX-221), orange dot (AS-604850) and blue dot (alpelisib).

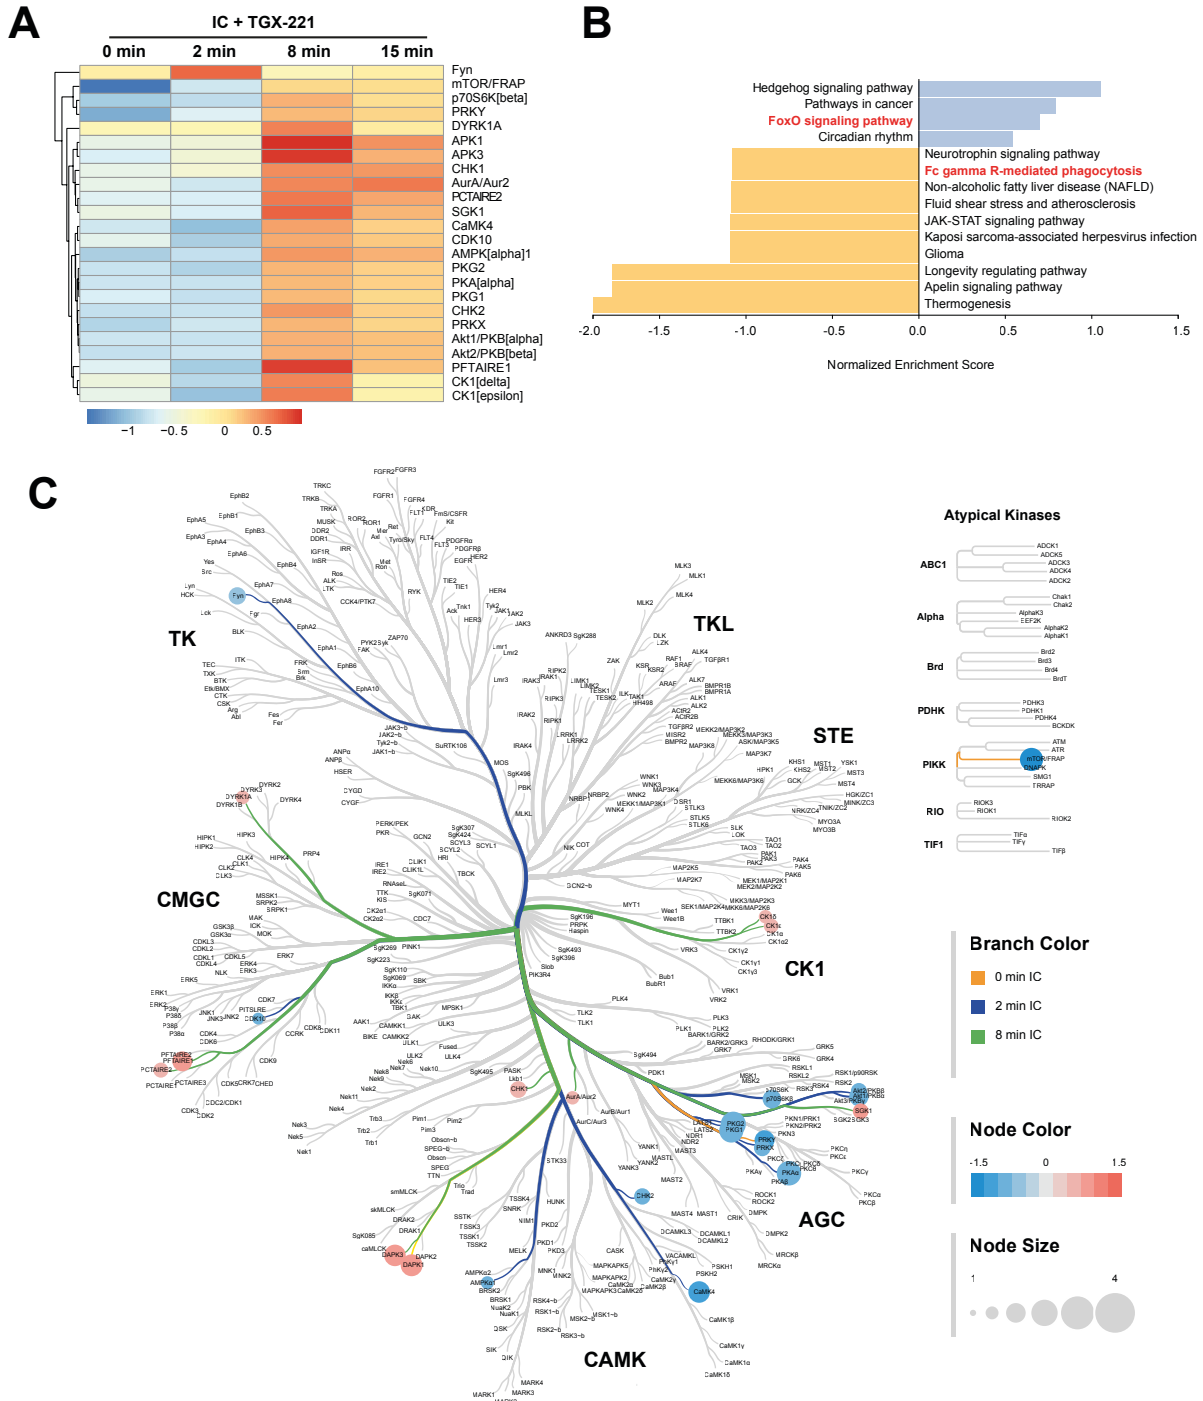

**Figure S5. Inhibition of IC-induced signal transduction by TGX-221.** Freshly isolated human blood PMNs were treated with w/ or w/o 10  $\mu$ M TGX-221 for 5 min and subsequently activated with IC for 0, 2, 8, or 15 min. Cells were lysed and the PTK and STK activity was measured by PamGene. (A) Heatmap of mean kinase statistic in comparison to the respective timepoints in IC-stimulated PMNs. (B) Enriched KEGG pathways (as shown by Webgestalt). (C) Kinome tree of all regulated PKT and STKs over the time. Node size: mean final score, node color: mean kinase statistic. Data is based on 3 replicates per group.

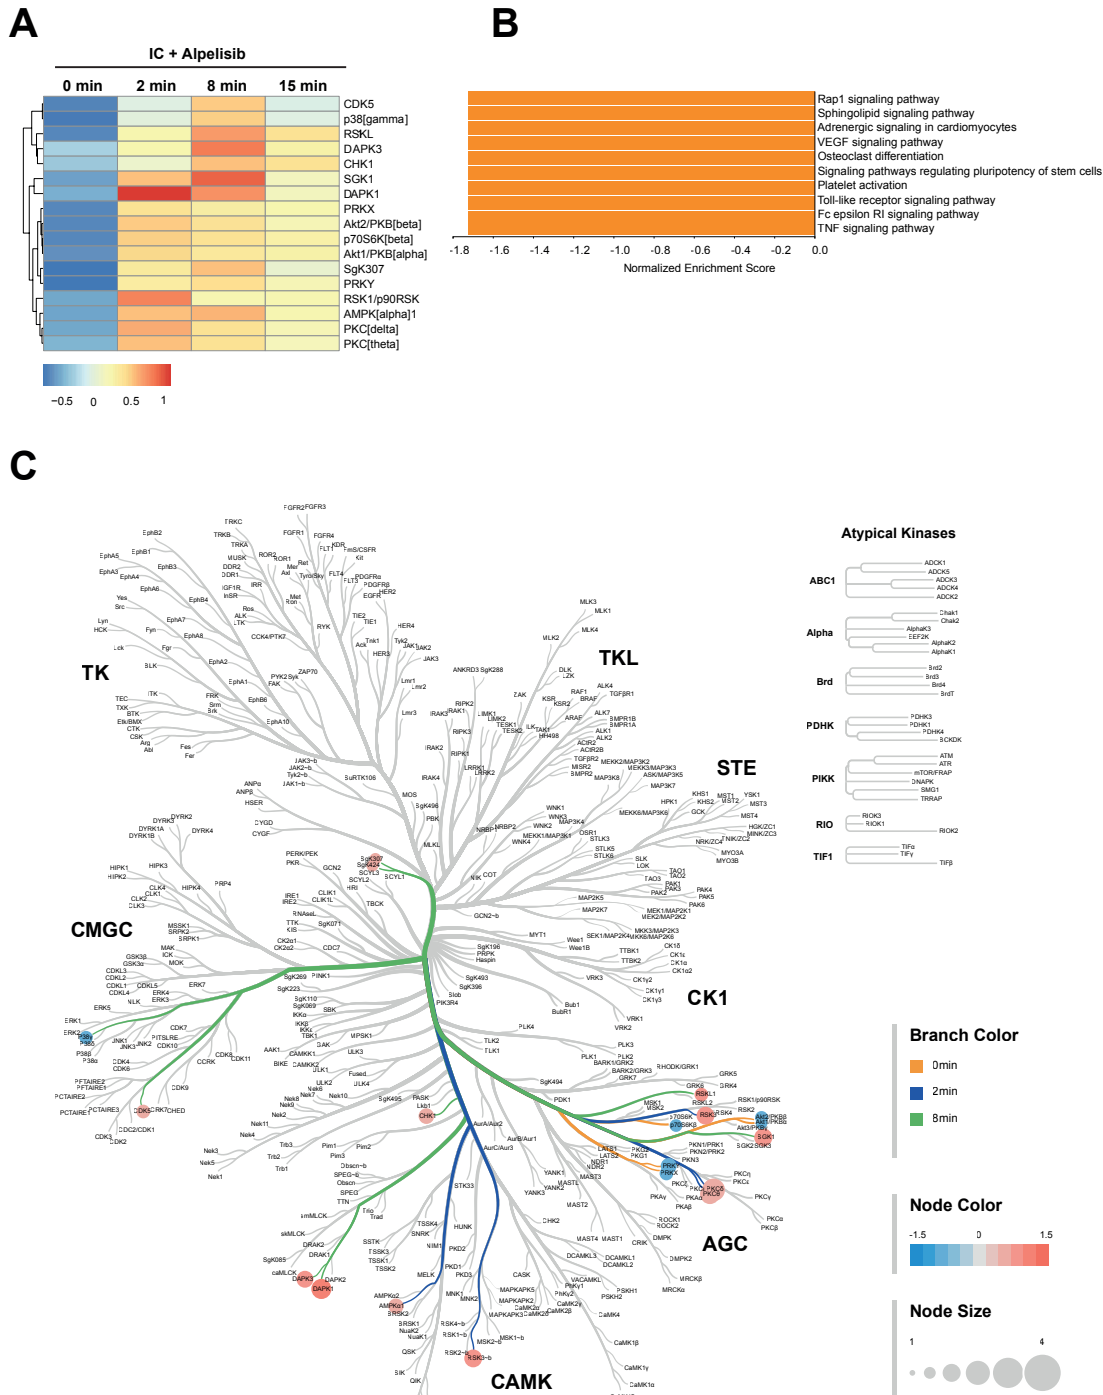

**Figure S6. Inhibition of IC-induced signal transduction by alpelisib.** Freshly isolated human blood PMNs were treated with w/o 1  $\mu$ M alpelisib for 5 min and subsequently activated with IC for 0, 2, 8, or 15 min. Cells were lysed and the PTK and STK activity was measured by PamGene. (A) Heatmap of mean kinase statistic in comparison to the respective timepoints in IC-stimulated PMNs. (B) Enriched KEGG pathways (as shown by Webgestalt). (C) Kinome tree of all regulated PTK and STKs over the time. Node size: mean final score, node color: mean kinase statistic. Data is based on 3 replicates per group.

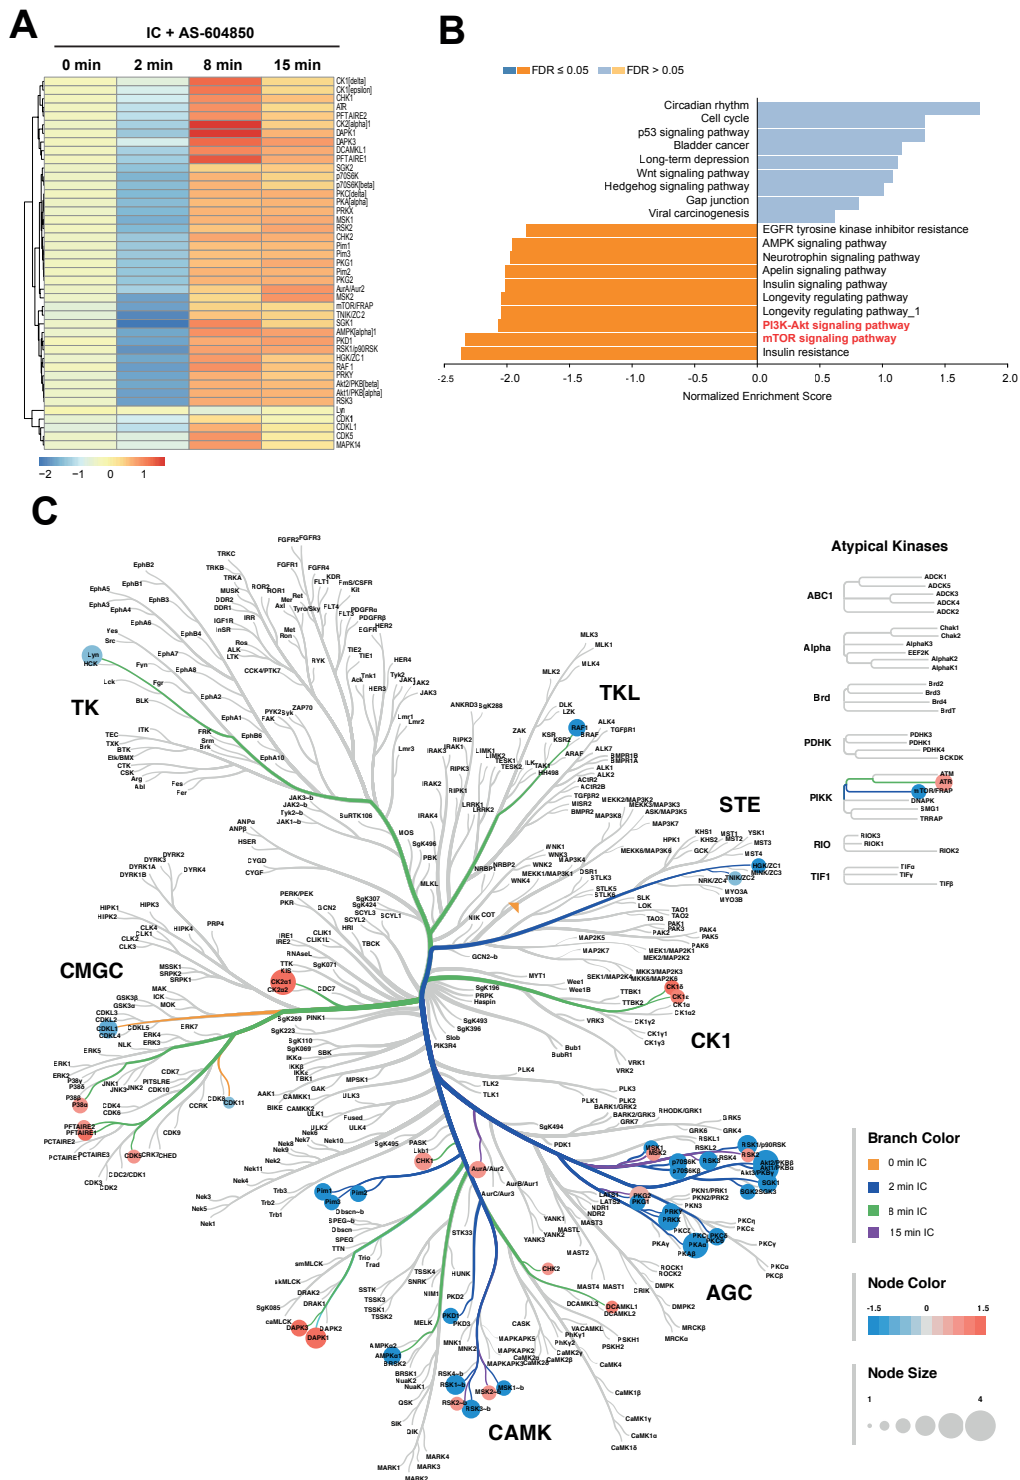

**Figure S7. Inhibition of IC-induced signal transduction by AS-604850.** Freshly isolated human blood PMNs were activated with IC for 0, 2, 8, or 15 min w/o 5  $\mu$ M alpelisib. Cells were lysed and the PTK and STK activity was measured by PameGene. (A) Heatmap of mean kinase statistic in comparison to the respective timepoints in IC-stimulated PMNs. (B) Enriched KEGG pathways (as shown by Webgestalt). (C) Kinome tree of all regulated PKT and STKs over the time. Node size: mean final score, node color: mean kinase statistic. Data is based on 3 replicates per group.

## Supplementary Tables

| Name      | IC50 p110 $\alpha$ | IC50 p110 $\beta$ | IC50 p110 $\gamma$ | IC50 p110 $\delta$ | Catalog no. | Stock (DMSO) | Dosage /day | MW     | Reference Citation      |
|-----------|--------------------|-------------------|--------------------|--------------------|-------------|--------------|-------------|--------|-------------------------|
| HS-173    | 0.8 nM             | -                 | -                  | -                  | S7356       | 25 mg/mL     | 20 mg/kg    | 422.46 | (Camps et al., 2005)    |
| alpelisib | 5.0 nM             | -                 | -                  | -                  | S2814       | 62.5 mg/mL   | 50 mg/kg    | 441.47 | (Junttila et al., 2009) |
| TGX-221   | 5.0 $\mu$ M        | 5.0 nM            | >10 $\mu$ M        | 0.1 $\mu$ M        | S1169       | 312.5 mg/mL  | 250 mg/kg   | 364.4  | (Soond et al., 2010)    |
| AS-604850 | 4.5 $\mu$ M        | >20 $\mu$ M       | 0.55 $\mu$ M       | >20 $\mu$ M        | S2681       | 37.5 mg/mL   | 30 mg/kg    | 285.2  | (Bird et al., 2011)     |
| AMG319    | 33 $\mu$ M         | 2.7 $\mu$ M       | 850 nM             | 18 nM              | S7813       | 3.75 mg/mL   | 3 mg/kg     | 385.4  | (Son et al., 2013)      |
| IC-87114  | -                  | 75 $\mu$ M        | 29 $\mu$ M         | 0.5 $\mu$ M        | S1268       | 75 mg/mL     | 60 mg/kg    | 397.43 | (Cushing et al., 2015)  |
| GDC-0941  | 3.0 nM             | 33 nM             | 75 nM              | 3.0 nM             | S1065       | 187.5 mg/mL  | 150 mg/kg   | 513.64 | (Yuan et al., 2019)     |

**Table S1. Overview of the used PI3K isoform-selective inhibitors.** Numbers correspond to the IC50 in nM, and if in bold, indicate the selectivity of the compound. “-“ indicates that no data on the IC50 for that isoform is provided. All IC50s were determined in cell-free assays. IC50 values in the detected range (<1 nM - 1  $\mu$ M) for performed in vitro experiments are indicated in bright green. Data has been derived from the Selleckchem Website (<https://www.selleckchem.com/>, accessed April 16<sup>th</sup>, 2021).



| I Body weight                                                                                                                                                         | value |
|-----------------------------------------------------------------------------------------------------------------------------------------------------------------------|-------|
| unaffected or rise                                                                                                                                                    | 0     |
| Weight reduction <5 % compared to day 0 of the experiment                                                                                                             | 1     |
| Weight reduction 5-10 % compared to day 0 of the experiment                                                                                                           | 5     |
| Weight reduction 11-20 % compared to day 0 of the experiment                                                                                                          | 10    |
| Weight reduction >20 % compared to day 0 of the experiment                                                                                                            | 20    |
| II General condition                                                                                                                                                  |       |
| Coat smooth, shiny, body openings clean, eyes clear, shiny                                                                                                            | 0     |
| Fur blunt, disorderly, unkempt body openings, eyes cloudy, increased muscle tone                                                                                      | 1     |
| Dirty coat, sticky or wet body openings, abnormal posture, eyes cloudy, increased muscle tone                                                                         | 5     |
| Dirty coat, sticky or damp body openings, abnormal posture, eyes cloudy; high muscle tone                                                                             | 10    |
| Cramps, paralysis (trunk muscles, extremities), wheezing, animal feels cold                                                                                           | 20    |
| III Spontaneous behavior                                                                                                                                              |       |
| Normal behavior (sleeping, reaction to blowing and touching, curiosity, social contacts)                                                                              | 0     |
| Small deviations from the normal behavior                                                                                                                             | 1     |
| Unusual behavior, impaired motor function or hyperkinetics (noticeable scratching over 2 of 10 min)                                                                   | 5     |
| Self-isolation, lethargy, pronounced hyperkinetics or behavioral stereotypies, coordination disorders hyperkinetics (noticeable scratching behavior over 5 of 10 min) | 10    |
| Repeated pain sounds when grasping, self-amputation (autoaggression, autotomy)                                                                                        | 20    |
| IV Clinical findings (measurements of temperature and respiration only if abnormalities are observed under II and III)                                                |       |
| Temperature, respiration and pulse normal, extremities warm, mucous membranes well supplied with blood                                                                | 0     |
| Small deviations from the normal situation                                                                                                                            | 1     |
| Temperature deviation 1 - 2 °C, respiration and pulse + 30%                                                                                                           | 5     |
| Temperature deviation > 2 °C, respiration / pulse +/- 50%                                                                                                             | 10    |
| Temperature, respiration and pulse normal, extremities warm, mucous membranes well supplied with blood                                                                | 20    |
| Sum                                                                                                                                                                   | 0-80  |

**Table S2. Adverse events score (I).** The sum of all side adverse effects was added to a total sum showed in supplemental table 3.

| Systemic treatment | Adverse events score (mean $\pm$ SD) |
|--------------------|--------------------------------------|
| HS-173             | 2.50 $\pm$ 2.20                      |
| alpelisib          | 3.13 $\pm$ 3.60                      |
| TGX-221            | 1.50 $\pm$ 1.41                      |
| AS-604850          | 1.25 $\pm$ 0.46                      |
| AMG319             | 1.25 $\pm$ 0.46                      |
| IC-87114           | 3.50 $\pm$ 4.63                      |
| GDC-0941           | 1.13 $\pm$ 0.35                      |
| control            | 1.56 $\pm$ 1.74                      |
| Topical treatment  | Adverse events score (mean $\pm$ SD) |
| HS-173             | 2.75 $\pm$ 2.05                      |
| alpelisib          | 6.00 $\pm$ 3.78                      |
| TGX-221            | 2.63 $\pm$ 2.13                      |
| AS-604850          | 3.88 $\pm$ 3.52                      |
| AMG319             | 1.25 $\pm$ 0.71                      |
| IC-87114           | 3.00 $\pm$ 2.51                      |
| GDC-0941           | 2.38 $\pm$ 2.26                      |
| control            | 3.44 $\pm$ 3.50                      |

**Table S3. Adverse events score (II).** The mean and SD of the adverse effects of the experiments shown in figure 5 are summarized in here. Treatment with PI3K inhibitors did not increase the suffering of mice during local EBA as the adverse events score is not significantly changed.

| Kinase          | 2 min  | 8 min  | 15 min |
|-----------------|--------|--------|--------|
| TNIK/ZC2        | -0.771 | -1.545 | -0.514 |
| SGK1            | -0.174 | -2.114 | -0.465 |
| RAF1            | -0.264 | -1.460 | -0.446 |
| PRKY            | -0.796 | -1.297 | -0.754 |
| p70S6K          | -0.608 | -1.103 | -0.561 |
| p38[gamma]      | -0.877 | -1.454 | -0.745 |
| p38[delta]      | -0.857 | -1.086 | -0.641 |
| mTOR/FRAP       | -0.773 | -1.300 | -0.630 |
| JNK3            | -0.572 | -0.956 | -0.511 |
| JNK1            | -0.573 | -0.964 | -0.519 |
| ICK             | -0.924 | -1.610 | -0.597 |
| HGK/ZC1         | -0.319 | -1.702 | -0.427 |
| ERK5            | -0.965 | -1.355 | -0.547 |
| ERK2            | -0.619 | -0.990 | -0.431 |
| ERK1            | -0.626 | -0.951 | -0.406 |
| DCAMKL1         | 0.259  | -1.562 | -0.767 |
| CDKL5           | -0.992 | -1.395 | -0.482 |
| CDKL2           | -1.372 | -1.625 | -0.250 |
| CDK6            | -0.900 | -1.087 | -0.560 |
| CDK4            | -0.861 | -1.157 | -0.544 |
| CDK2            | -0.813 | -1.181 | -0.535 |
| CDK11           | -1.202 | -1.183 | -0.619 |
| CDC2/CDK1       | -0.674 | -1.095 | -0.541 |
| ATR             | -0.680 | -0.848 | -0.582 |
| AMPK[alpha]1    | -0.269 | -1.168 | -0.757 |
| AlphaK1         | -1.279 | -1.612 | -0.427 |
| Akt1/PKB[alpha] | -0.204 | -1.068 | -0.739 |
| ADCK3           | -0.671 | -0.925 | -0.631 |

**Table S4. Mean kinase statistic of PKT and STK activation.** Human PMNs (n=3) were stimulated with hCOL7/anti-hCOL7 ICs for the indicated time points. The mean kinase statistic is shown here as grey if upregulated (positive value) or downregulated (negative value) in comparison to unstimulated PMNs if they had a mean specificity score of 1 and a significance score of 0.5.

| Kinase          | 0 min  | 2 min  | 8 min  | 15 min |
|-----------------|--------|--------|--------|--------|
| SGK1            | -0.506 | -0.654 | 0.695  | 0.319  |
| PRKY            | -1.101 | -0.632 | 0.306  | 0.185  |
| PRKX            | -0.847 | -0.701 | 0.312  | 0.187  |
| PKG2            | -0.746 | -0.870 | 0.317  | 0.195  |
| PKG1            | -0.673 | -0.777 | 0.284  | 0.162  |
| PKA[alpha]      | -0.737 | -0.746 | 0.305  | 0.194  |
| PFTAIRE1        | -0.610 | -0.909 | 0.825  | 0.281  |
| PCTAIRE2        | -0.605 | -0.669 | 0.592  | 0.397  |
| p70S6K[beta]    | -0.921 | -0.797 | 0.331  | 0.108  |
| mTOR/FRAP       | -1.422 | -0.713 | 0.164  | 0.132  |
| Fyn             | -0.060 | 0.663  | -0.198 | -0.044 |
| DYRK1A          | -0.172 | -0.156 | 0.541  | 0.000  |
| DAPK3           | -0.665 | -0.408 | 0.859  | 0.352  |
| DAPK1           | -0.519 | -0.439 | 0.914  | 0.489  |
| CK1[epsilon]    | -0.556 | -0.983 | 0.581  | -0.116 |
| CK1[delta]      | -0.442 | -0.834 | 0.533  | -0.117 |
| CHK2            | -0.779 | -0.750 | 0.461  | 0.210  |
| CHK1            | -0.535 | -0.372 | 0.515  | 0.456  |
| CDK10           | -0.575 | -0.894 | 0.372  | 0.230  |
| CaMK4           | -0.709 | -1.007 | 0.406  | 0.207  |
| AurA/Aur2       | -0.541 | -0.721 | 0.519  | 0.601  |
| AMPK[alpha]1    | -0.893 | -0.789 | 0.452  | 0.352  |
| AMPK[alpha]1    | -0.893 | -0.789 | 0.452  | 0.352  |
| Akt2/PKB[beta]  | -0.770 | -0.728 | 0.351  | 0.267  |
| Akt1/PKB[alpha] | -0.743 | -0.756 | 0.330  | 0.263  |

**Table S5. Mean kinase statistic of PKT and STK activation after TGX-221 inhibition.** Human PMNs (n=3) were stimulated with ICs in presence of 10  $\mu$ M TGX-221 for the indicated time points in comparison to IC stimulated PMNs without TGX-221. The mean kinase statistic is shown here as grey if upregulated (positive value) or downregulated (negative value) in comparison to PMNs if they had a mean specificity score of 1 and a significance score of 0.5.

| Kinase          | 0 min  | 2 min  | 8 min | 15 min |
|-----------------|--------|--------|-------|--------|
| SgK307          | -0.847 | 0.308  | 0.549 | 0.012  |
| SGK1            | -0.627 | 0.548  | 0.954 | 0.097  |
| RSKL1           | -0.741 | 0.213  | 0.695 | 0.390  |
| RSK1/p90RSK     | -0.582 | 0.801  | 0.198 | 0.198  |
| PRKY            | -0.841 | 0.305  | 0.423 | 0.153  |
| PRKX            | -0.726 | 0.385  | 0.272 | 0.221  |
| PKC[theta]      | -0.529 | 0.551  | 0.386 | 0.124  |
| PKC[delta]      | -0.576 | 0.627  | 0.389 | 0.164  |
| p70S6K[beta]    | -0.731 | 0.484  | 0.397 | 0.248  |
| p38[gamma]      | -0.811 | -0.076 | 0.490 | -0.117 |
| DAPK3           | -0.342 | 0.223  | 0.852 | 0.247  |
| DAPK1           | -0.542 | 1.108  | 0.743 | 0.107  |
| CHK1            | -0.400 | 0.026  | 0.563 | 0.404  |
| CDK5            | -0.762 | -0.122 | 0.523 | -0.131 |
| AMPK[alpha]1    | -0.606 | 0.555  | 0.589 | 0.205  |
| Akt2/PKB[beta]  | -0.727 | 0.510  | 0.367 | 0.161  |
| Akt1/PKB[alpha] | -0.713 | 0.448  | 0.343 | 0.232  |

**Table S6. Mean kinase statistic of PKT and STK activation after alpelisib inhibition.** Human PMNs (n=3) were stimulated with ICs in presence of 1  $\mu$ M alpelisib for the indicated time points in comparison to IC stimulated PMNs without TGX-221. The mean kinase statistic is shown here as grey if upregulated (positive value) or downregulated (negative value) in comparison to PMNs if they had a mean specificity score of 1 and a significance score of 0.5.

| Kinase       | 0min   | 2min   | 8min   | 15min  |
|--------------|--------|--------|--------|--------|
| TNIK/ZC2     | -0.645 | -1.940 | 0.473  | 0.374  |
| SGK2         | -0.413 | -1.413 | 0.373  | 0.444  |
| SGK1         | -0.468 | -2.164 | 0.956  | 0.371  |
| RSK3         | -0.462 | -1.745 | 0.665  | 0.611  |
| RSK2         | -0.391 | -1.496 | 0.481  | 0.726  |
| RSK1/p90RSK  | -0.375 | -1.851 | 0.736  | 0.726  |
| RAF1         | -0.331 | -1.762 | 0.901  | 0.487  |
| PRKY         | -0.513 | -1.682 | 0.622  | 0.435  |
| PRKX         | -0.457 | -1.489 | 0.594  | 0.609  |
| PKG2         | -0.396 | -1.347 | 0.606  | 0.648  |
| PKG1         | -0.397 | -1.363 | 0.524  | 0.665  |
| PKD1         | -0.319 | -1.703 | 0.664  | 0.772  |
| PKC[delta]   | -0.387 | -1.493 | 0.584  | 0.649  |
| PKA[alpha]   | -0.429 | -1.468 | 0.566  | 0.603  |
| Pim3         | -0.411 | -1.307 | 0.523  | 0.548  |
| Pim2         | -0.395 | -1.367 | 0.590  | 0.608  |
| Pim1         | -0.402 | -1.322 | 0.521  | 0.554  |
| PFTAIRE2     | -0.379 | -1.069 | 0.883  | 0.455  |
| PFTAIRE1     | -0.354 | -1.262 | 1.330  | 0.681  |
| p70S6K[beta] | -0.421 | -1.470 | 0.582  | 0.367  |
| p70S6K       | -0.421 | -1.540 | 0.582  | 0.367  |
| mTOR/FRAP    | -0.643 | -1.722 | 0.358  | 0.302  |
| MSK2         | -0.454 | -1.735 | 0.332  | 0.878  |
| MSK1         | -0.385 | -1.597 | 0.591  | 0.684  |
| MAPK14       | -0.506 | -0.747 | 0.816  | 0.157  |
| Lyn          | -0.170 | -0.297 | -0.628 | -0.214 |
| HGK/ZC1      | -0.481 | -1.671 | 0.824  | 0.454  |
| DCAMKL1      | -0.391 | -1.195 | 0.978  | 0.687  |
| DAPK3        | -0.340 | -0.836 | 1.244  | 0.820  |
| DAPK1        | -0.376 | -1.312 | 1.583  | 0.590  |
| CK2[alpha]1  | -0.422 | -1.190 | 1.592  | 0.419  |
| CK1[epsilon] | -0.347 | -0.819 | 1.121  | 0.346  |

|                 |        |        |       |        |
|-----------------|--------|--------|-------|--------|
| CK1[delta]      | -0.316 | -0.674 | 1.250 | 0.339  |
| CHK2            | -0.406 | -1.316 | 0.716 | 0.632  |
| CHK1            | -0.339 | -0.898 | 0.949 | 0.507  |
| CDKL1           | -0.692 | -1.068 | 0.636 | 0.084  |
| CDK5            | -0.459 | -0.716 | 0.844 | 0.037  |
| CDK11           | -0.579 | -0.863 | 0.273 | -0.216 |
| AurA/Aur2       | -0.414 | -1.200 | 0.405 | 0.873  |
| ATR             | -0.364 | -1.012 | 0.894 | 0.313  |
| AMPK[alpha]1    | -0.497 | -1.640 | 0.888 | 0.735  |
| Akt2/PKB[beta]  | -0.447 | -1.668 | 0.620 | 0.569  |
| Akt1/PKB[alpha] | -0.440 | -1.715 | 0.632 | 0.596  |

**Table S7. Mean kinase statistic of PKT and STK activation after AS-604850 inhibition.** Human PMNs (n=3) were stimulated with ICs in presence of 5  $\mu$ M AS-604850 for the indicated time points in comparison to IC stimulated PMNs without AS-604850. The mean kinase statistic is shown here as grey if upregulated (positive value) or downregulated (negative value) in comparison to PMNs if they had a mean specificity score of 1 and a significance score of 0.5.

## Supplementary References

- Bird, J.E., Smith, P.L., Bostwick, J.S., Shipkova, P., and Schumacher, W.A. (2011). Bleeding response induced by anti-thrombotic doses of a phosphoinositide 3-kinase (PI3K)-beta inhibitor in mice. *Thromb Res* 127(6), 560-564. doi: 10.1016/j.thromres.2011.02.007.
- Camps, M., Ruckle, T., Ji, H., Ardissone, V., Rintelen, F., Shaw, J., et al. (2005). Blockade of PI3Kgamma suppresses joint inflammation and damage in mouse models of rheumatoid arthritis. *Nat Med* 11(9), 936-943. doi: 10.1038/nm1284.
- Cushing, T.D., Hao, X., Shin, Y., Andrews, K., Brown, M., Cardozo, M., et al. (2015). Discovery and in vivo evaluation of (S)-N-(1-(7-fluoro-2-(pyridin-2-yl)quinolin-3-yl)ethyl)-9H-purin-6-amine (AMG319) and related PI3Kdelta inhibitors for inflammation and autoimmune disease. *J Med Chem* 58(1), 480-511. doi: 10.1021/jm501624r.
- Junttila, T.T., Akita, R.W., Parsons, K., Fields, C., Lewis Phillips, G.D., Friedman, L.S., et al. (2009). Ligand-independent HER2/HER3/PI3K complex is disrupted by trastuzumab and is effectively inhibited by the PI3K inhibitor GDC-0941. *Cancer Cell* 15(5), 429-440. doi: 10.1016/j.ccr.2009.03.020.
- Son, M.K., Ryu, Y.L., Jung, K.H., Lee, H., Lee, H.S., Yan, H.H., et al. (2013). HS-173, a novel PI3K inhibitor, attenuates the activation of hepatic stellate cells in liver fibrosis. *Sci Rep* 3, 3470. doi: 10.1038/srep03470.
- Soond, D.R., Bjorgo, E., Moltu, K., Dale, V.Q., Patton, D.T., Torgersen, K.M., et al. (2010). PI3K p110delta regulates T-cell cytokine production during primary and secondary immune responses in mice and humans. *Blood* 115(11), 2203-2213. doi: 10.1182/blood-2009-07-232330.
- Yuan, Y., Wen, W., Yost, S.E., Xing, Q., Yan, J., Han, E.S., et al. (2019). Combination therapy with BYL719 and LEE011 is synergistic and causes a greater suppression of p-S6 in triple negative breast cancer. *Sci Rep* 9(1), 7509. doi: 10.1038/s41598-019-43429-7.
